# Supplementary material for: All-Perfluorosulfonated-Ionomer Composite Membranes Containing Blow-Spun Fibers: Effect of a Thin Fiber Framework on Proton Conductivity and Mechanical Properties
Source: PubMed Central journal article supplement (PMC10910440; doi:10.1021/acsami.3c17643), 2024-02-21
Supplement: am3c17643_si_001.pdf [file am3c17643_si_001.pdf]

# Supporting Information

## All-Perfluorosulfonated-Ionomer Composite

## Membranes Containing Blow-Spun Fibers: Effect of a Thin Fiber Framework on Proton Conductivity and Mechanical Properties

Shuta Onuki,<sup>†, ¶</sup> Yoshiki Kawai,<sup>†,\*, ¶</sup> Hiroyasu Masunaga,<sup>‡</sup> Noboru Ohta,<sup>‡</sup> Ryohei Kikuchi,<sup>§</sup>  
Minoru Ashizawa,<sup>†</sup> Yuta Nabae<sup>†</sup>, and Hidetoshi Matsumoto<sup>†,\*</sup>

<sup>†</sup> Department of Materials Science and Engineering, Tokyo Institute of Technology, 2-12-1  
Ookayama, Meguro-ku, Tokyo 152-8552, Japan

<sup>‡</sup> Japan Synchrotron Radiation Research Institute, 1-1-1 Kouto, Sayo, Hyogo 679-5198, Japan

<sup>§</sup> Materials Analysis Division, Open Facility Center, Tokyo Institute of Technology, 2-12-1  
Ookayama, Meguro-ku, Tokyo 152-8550, Japan

\*Address correspondence to [matsumoto.h.ac@m.titech.ac.jp](mailto:matsumoto.h.ac@m.titech.ac.jp) and [kawai.y.ag@m.titech.ac.jp](mailto:kawai.y.ag@m.titech.ac.jp)

<sup>¶</sup> Shuta Onuki and Yoshiki Kawai contributed equally.

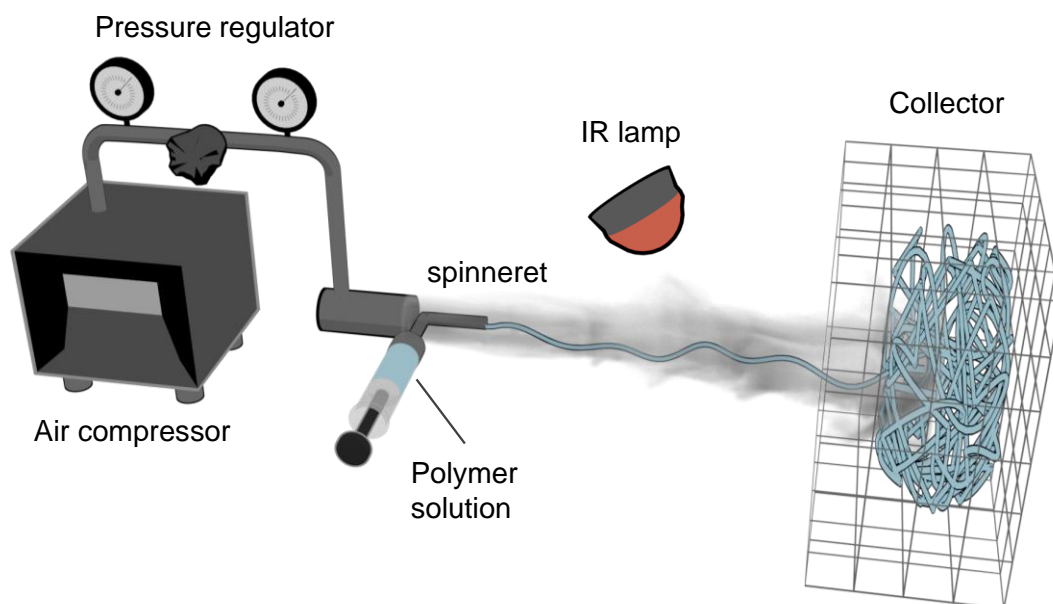

**Figure S1.** Schematic of the apparatus used for blow spinning.

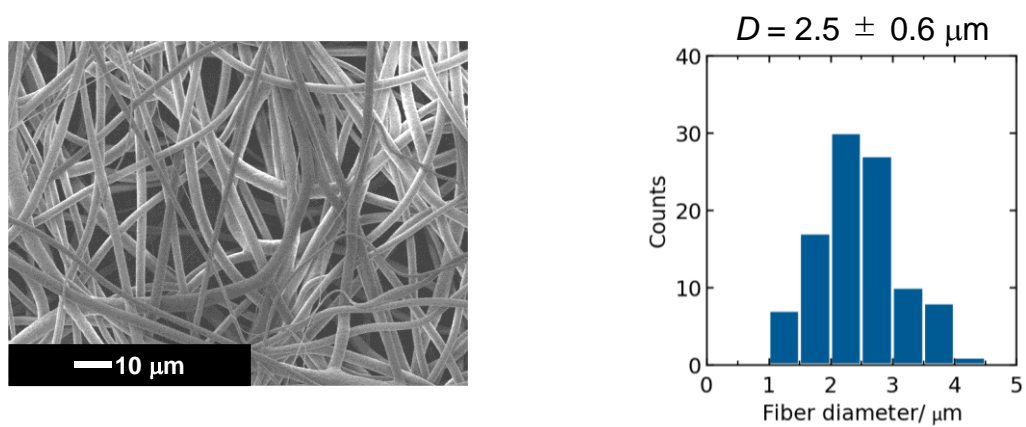

**Figure S2.** Surface SEM image and the fiber diameter distributions, determined by SEM image analysis, for the hot-pressed PVDF thin-fiber webs.

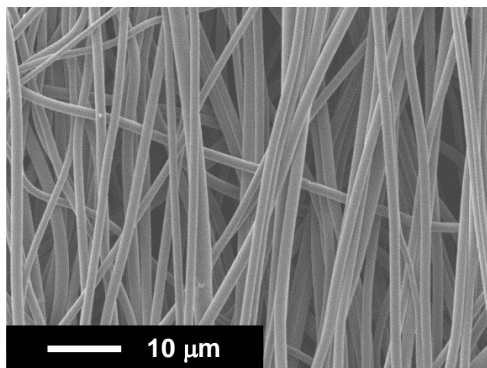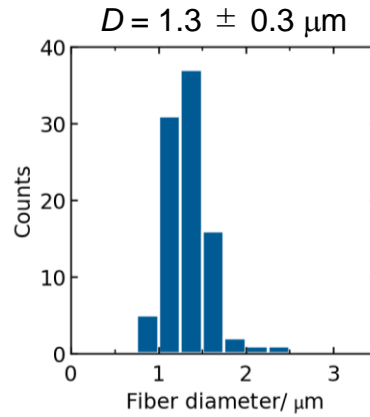

**Figure S3.** Surface SEM image and the fiber diameter distributions, determined by SEM image analysis, for the as-spun aligned PFSA thin-fiber sheets with a second-order parameter  $S$  of 0.86. The alignment of the thin fibers in the sheets was determined from the SEM images using a second-order parameter calculated using the ImageJ software. The second-order parameter  $S$  was defined according to the following equation [1]:

$$S = 2(\cos^2\theta) - 1 = \cos 2\theta \quad (1)$$

where  $\theta$  is the angle between the direction of the fibers and vertical direction in the SEM image.

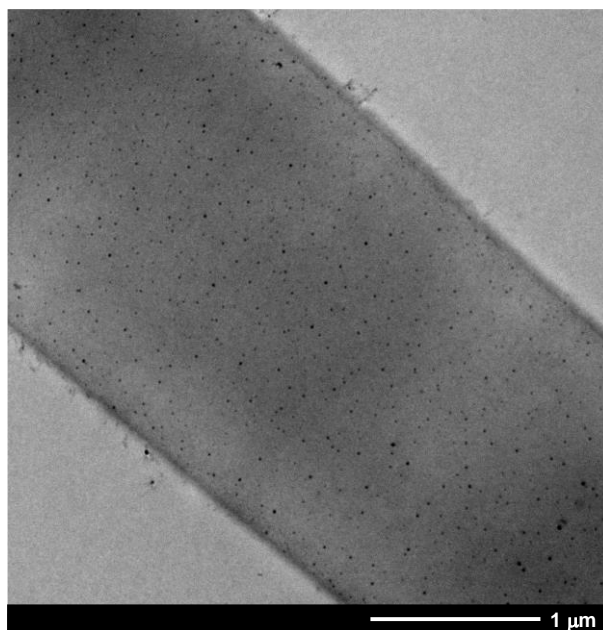

**Figure S4.** Typical TEM image of the post-treated PFSA thin fiber. The counterions of the PFSA thin fiber were exchanged with  $\text{Ag}^+$ .

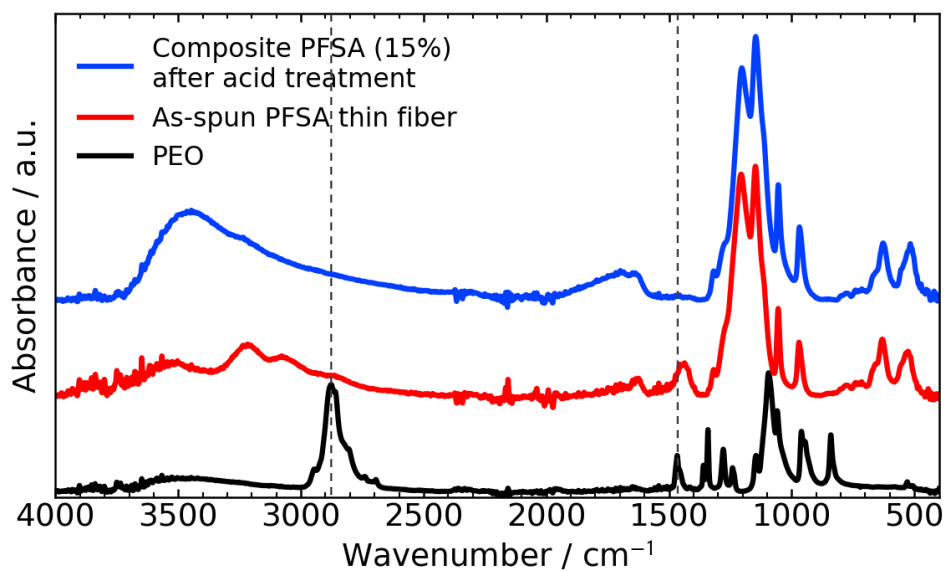

**Figure S5.** FTIR spectra of the all-PFSA thin-fiber composite PEMs (thin fiber content of 15 wt%) after acid treatment.

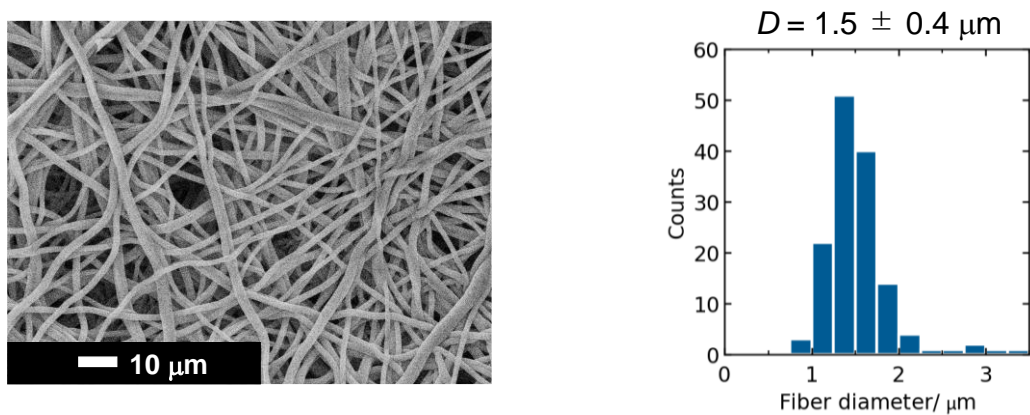

**Figure S6.** Surface SEM image and the fiber diameter distribution, determined by SEM image analysis, for the hot-treated PFSA thin-fiber webs after acid treatment.

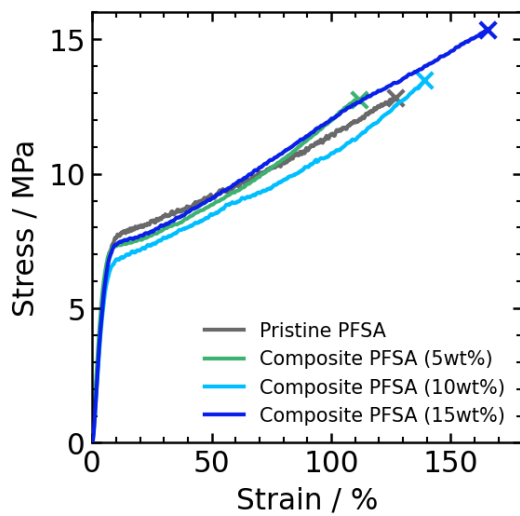

**Figure S7.** Typical stress–strain curves of the pristine and composite PFSA membranes.

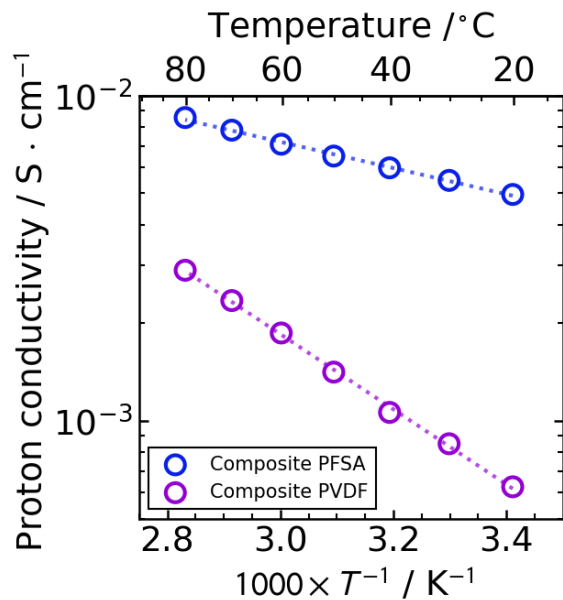

**Figure S8.** Temperature dependence of the proton conductivity through the PVDF thin-fiber composite (15 wt%) and PFSA thin-fiber composite (15 wt%) membranes at 90 %RH.

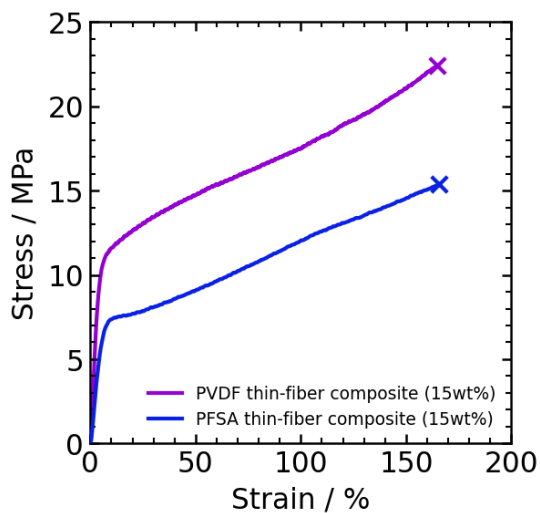

**Figure S9.** Stress–strain curve of the PVDF thin-fiber composite (15 wt%) and PFSA thin-fiber composite (15 wt%) membranes.

**Figure S10** shows typical TGA and DSC curves of the pristine and composite PFSA membranes. Both membranes exhibited a similar thermal behavior. For the TG curves, the gradual weight loss of approximately 6-8 % in the range from 25 to 180 °C would be due to the loss of water molecules. The sharp weight loss at approximately at 280 °C would be associated with desulfonation [2]. For the DSC curves, an endothermic peak near 113 °C attributed to the glass transition behavior of amorphous ionic domains of PFSA was observed [2].

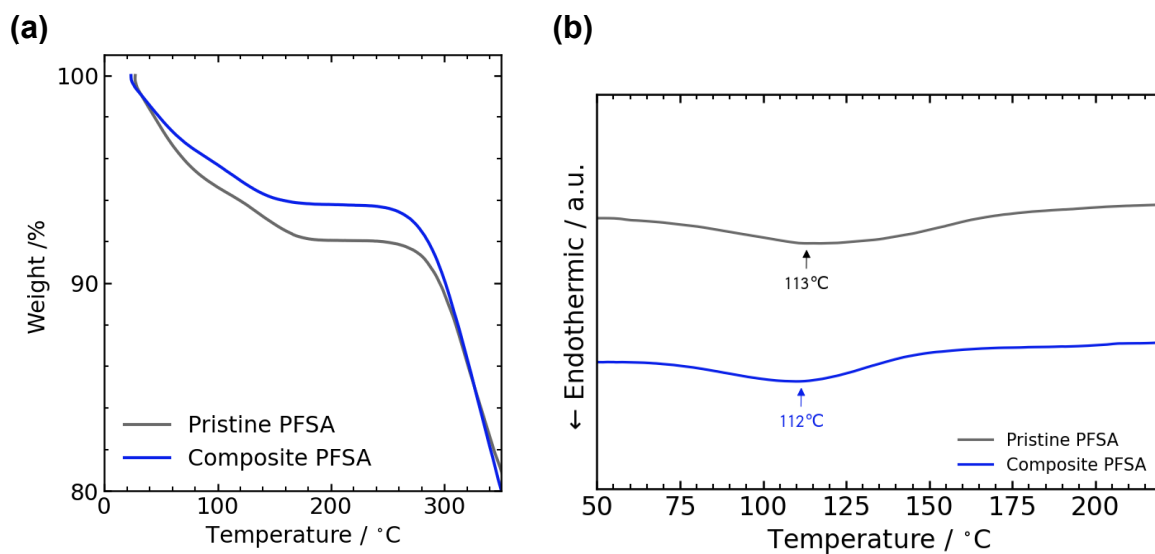

**Figure S10.** Typical (a) TGA and (b) DSC curves of the pristine and composite PFSA membranes (thin fiber content of 15 wt%).

**Table S1.** Reported FC performances of representative PEMs

| PEM                                     | Thickness [um] | Temperature [°C] | RH [%]     | $P_{max}$ [mW cm <sup>-2</sup> ] | Conditions                                                                                                                                                                                                              | Reference        |
|-----------------------------------------|----------------|------------------|------------|----------------------------------|-------------------------------------------------------------------------------------------------------------------------------------------------------------------------------------------------------------------------|------------------|
| <b>Composite PFSA (15 wt%)</b>          | <b>39</b>      | <b>80</b>        | <b>100</b> | <b>1,324</b><br><b>@0.05 V</b>   | MEA area: 1 cm <sup>2</sup> ,<br>0.4 mg-Pt cm <sup>-2</sup> ,<br>H <sub>2</sub> /O <sub>2</sub> without<br>back pressure                                                                                                | <b>This Work</b> |
|                                         | <b>36</b>      | <b>120</b>       | <b>25</b>  | <b>300</b><br><b>@0.35 V</b>     |                                                                                                                                                                                                                         |                  |
| PhySPI:<br>PBI(8:2)BNF<br>/Nafion       | 5              | 80               | 100        | 680*                             | @ 0.4V<br>25cm <sup>2</sup> , 0.4 mg-Pt<br>cm <sup>-2</sup> , H <sub>2</sub> /O <sub>2</sub><br>without back<br>pressure                                                                                                | [3]              |
|                                         |                | 120              | 24         | 176                              |                                                                                                                                                                                                                         |                  |
| Nafion<br>NR-211                        | 25             | 80               | 100        | 520*                             |                                                                                                                                                                                                                         |                  |
|                                         |                | 120              | 24         | 112                              |                                                                                                                                                                                                                         |                  |
| Nafion polymer                          | 20             | 80               | 95         | 1,469<br>@2.6 A cm <sup>-2</sup> | 25cm <sup>2</sup> , 0.4 mg-Pt<br>cm <sup>-2</sup> , H <sub>2</sub> /air with<br>backpressure 150<br>kPa and 140 kPa<br>for anode and<br>cathode,<br>respectively.                                                       | [4]              |
|                                         |                | 110              | 25         | 153<br>@0.9 A cm <sup>-2</sup>   |                                                                                                                                                                                                                         |                  |
| SCC PFSA                                | 20             | 80               | 95         | 1,588<br>@2.6 A cm <sup>-2</sup> |                                                                                                                                                                                                                         |                  |
|                                         |                | 110              | 25         | 279<br>@0.9 A cm <sup>-2</sup>   |                                                                                                                                                                                                                         |                  |
| Nafion-212                              | 51             | 110              | 25         | 121                              | 5 cm <sup>2</sup> , 0.5 mg-Pt<br>cm <sup>-2</sup> , H <sub>2</sub> /O <sub>2</sub><br>without back<br>pressure                                                                                                          | [5]              |
| sPSU-SGO                                | 50–55          | 110              | 25         | 183                              |                                                                                                                                                                                                                         |                  |
| sPSU                                    | 50–55          | 110              | 25         | 38                               |                                                                                                                                                                                                                         |                  |
| 3M 660/PPSU-NF<br>Composite<br>membrane | 51             | 80               | 93         | 630*                             | @0.6 V<br>5 cm <sup>2</sup> , 0.25 mg-<br>Pt cm <sup>-2</sup> (prior to<br>fuel cell testing,<br>MEAs were<br>briefly soaked in<br>1M H <sub>2</sub> SO <sub>4</sub> ),<br>H <sub>2</sub> /air without<br>back pressure | [6]              |
|                                         |                | 120              | 25         | 144*                             |                                                                                                                                                                                                                         |                  |
| Nafion<br>NR-211                        | 25             | 80               | 93         | 479*                             |                                                                                                                                                                                                                         |                  |
|                                         |                | 120              | 25         | 60*                              |                                                                                                                                                                                                                         |                  |
| PVDFHFP/Nafion<br>-DMD                  | 12             | 80               | 95         | 1570                             | 4 cm <sup>2</sup> , 0.5 mg-Pt<br>cm <sup>-2</sup> , H <sub>2</sub> /O <sub>2</sub><br>without back<br>pressure                                                                                                          | [7]              |
|                                         |                | 120              | 35         | 450                              |                                                                                                                                                                                                                         |                  |
| Nafion HP                               | 20             | 80               | 95         | 1330                             |                                                                                                                                                                                                                         |                  |



|                                                                            |       |     |     |              |                                                                                                               |     |
|----------------------------------------------------------------------------|-------|-----|-----|--------------|---------------------------------------------------------------------------------------------------------------|-----|
|                                                                            |       | 120 | 35  | 420          |                                                                                                               |     |
| PEI/Aquivion-SiO <sub>2</sub> /HPA                                         | 30–50 | 120 | 40  | 660          | No information of MEA area, 0.4 mg-Pt cm <sup>-2</sup> , H <sub>2</sub> /O <sub>2</sub> without back pressure | [8] |
| Aquivion E87-05S                                                           | 50    | 120 | 40  | 410          |                                                                                                               |     |
| Aquivion E79-03S (Solvicore 6 cells compressed at 15 kg cm <sup>-2</sup> ) |       | 80  | 100 | 727 @ 0.72 V |                                                                                                               |     |
|                                                                            |       | 110 | 33  | 401 @ 0.5V   |                                                                                                               |     |
| Aquivion E79-03S (Solvicore 6 cells compressed at 13 kg cm <sup>-2</sup> ) |       | 80  | 100 | 600 @0.6 V   |                                                                                                               |     |
|                                                                            | 30    | 120 | 25  | 237 @0.59 V  | 360 cm <sup>2</sup> , 0.6–0.8 mg-Pt cm <sup>-2</sup> , H <sub>2</sub> /air at 1.5 bar.                        | [9] |
| Aquivion E79-03S (JMFC 5 cells compressed at 10 kg cm <sup>-2</sup> )      |       | 80  | 100 | 675          |                                                                                                               |     |
|                                                                            |       | 110 | 33  | 370          |                                                                                                               |     |
| Aquivion E79-03S (Solvicore 5 cells compressed at 10 kg cm <sup>-2</sup> ) |       | 80  | 100 | 730          |                                                                                                               |     |
|                                                                            |       | 120 | 25  | 261          |                                                                                                               |     |

\*Calculated data from Reference.

Abbreviations: PFSA, perfluorosulfonic acid; Phy, phytic acid; SPI, sulfonated polyimide; PBI, polybenzimidazole; BNF, blend polymer nanofibers; SSC, short-side-chain; sPSU, sulfonated polysulfone; SGO, organo-sulfonated derivative of the graphene oxide; 3M 660, Perfluorosulfonic acid with EW of 660 from 3M Company; PPSU-NF, polyphenylsulfone nanofiber; PVDF-HFP, poly(vinylidene fluoride-co-hexafluoropropylene); DMD, direct membrane deposition; PEI, poly(ether imide); SiO<sub>2</sub>/HPA, SiO<sub>2</sub>/heteropolyacid nanoparticles; JMFC, Johnson Matthey fuel cells.

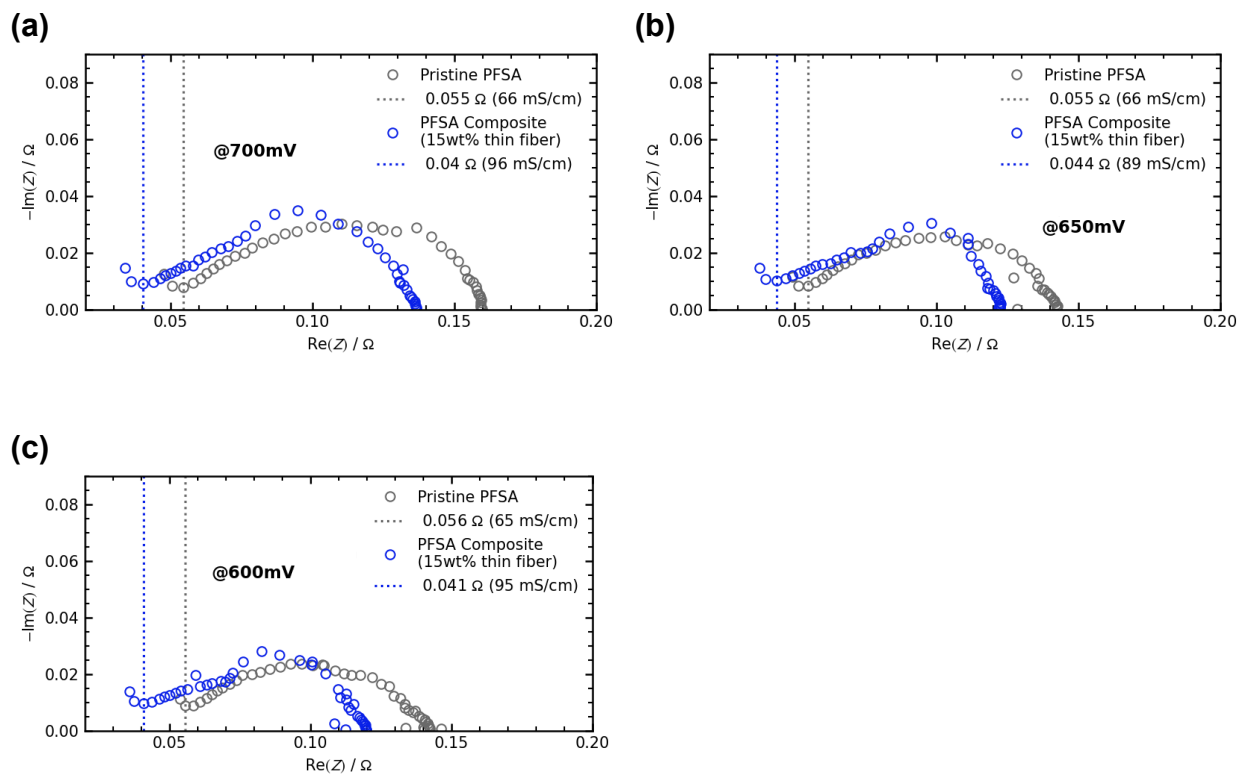

**Figure S11.** Nyquist plots of the FCs operated in (a) 0.7 V, (b) 0.65 V, and (c) 0.6 V at 80°C (100% RH@anode and 81% RH@cathode). The dotted lines show  $R_{\text{ohm}}$ .

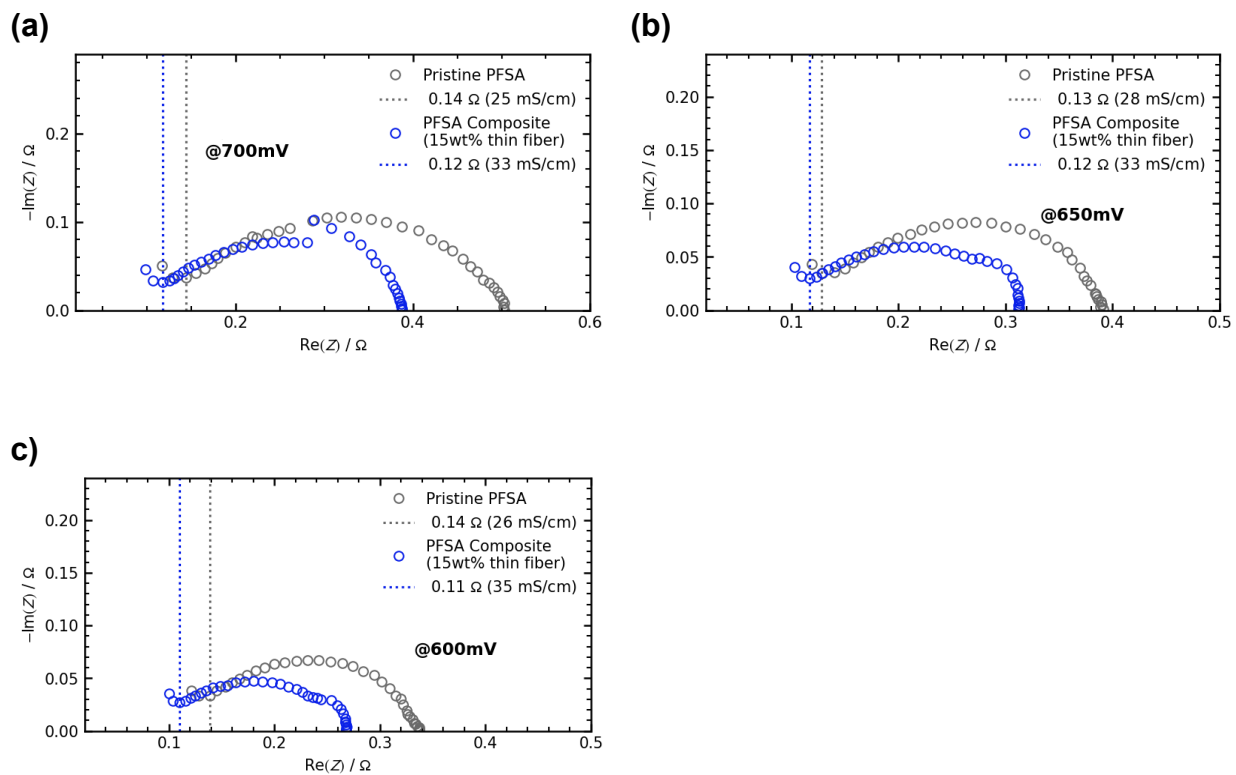

**Figure S12.** Nyquist plots of the FCs operated in (a) 0.7 V, (b) 0.65 V, and (c) 0.6 V at 100°C (47% RH@anode and 38% RH@cathode). The dotted lines show  $R_{ohm}$ .

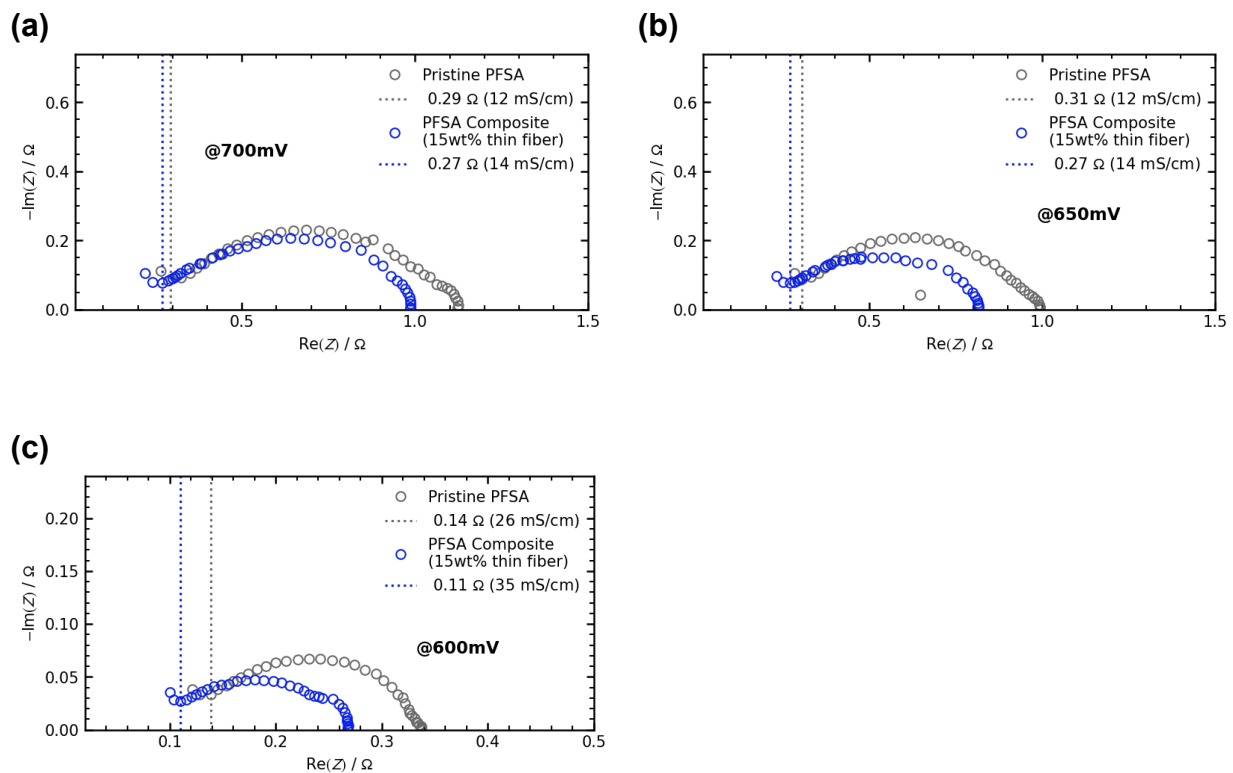

**Figure S13.** Nyquist plots of the FCs operated in (a) 0.7 V, (b) 0.65 V, and (c) 0.6 V at 120°C (24% RH@anode and 19% RH@cathode). The dotted lines show  $R_{\text{ohm}}$ .

## REFERENCES

1. Li, D.; Takarada, W.; Ashizawa, M.; Yamamoto, T.; Matsumoto, H. Effect of Hydrogen–Deuterium Exchange in Amide Linkages on Properties of Electrospun Polyamide Nanofibers. *Polymer* **2021**, *229*, 123994. DOI: 10.1016/j.polymer.2021.123994.
2. de Almeida; S. H., Kawano, Y. Thermal Behavior of Nafion Membranes. *J. Therm. Anal. Calorim.* **1999**, *58*, 569–597. DOI: 10.1023/A:1010196226309
3. Suzuki, K.; Tanaka, M.; Kuramochi, M.; Yamanouchi, S.; Miyaguchi, N.; Kawakami, H. Development of Blend Nanofiber Composite Polymer Electrolyte Membranes with Dual Proton Conductive Mechanism and High Stability for Next-Generation Fuel Cells. *ACS Appl. Polym. Mater.* **2023** *5*, 5177–5188, DOI: 10.1021/acsapm.3c00656
4. Guan, P.; Zou, Y.; Zhang, M.; Zhong, W.; Xu, J.; Lei, J.; Ding, H.; Feng, W.; Liu, F.; Zhang, Y. High-Temperature Low-Humidity Proton Exchange Membrane with "Stream-Reservoir" Ionic Channels for High-Power-Density Fuel Cells. *Sci. Adv.* **2023**, *9*, eadh1386. DOI: 10.1126/sciadv.adh1386
5. Simari, C.; Lufrano, E.; Brunetti, A.; Barbieri, G.; Nicotera, I. Polysulfone and Organo-Modified Graphene Oxide for New Hybrid Proton Exchange Membranes: A Green Alternative for High-Efficiency PEMFCs. *Electrochim. Acta* **2021**, *380*, 138214. DOI: 10.1016/j.electacta.2021.138214
6. Ballengee, J. B.; Haugen, G. M.; Hamrock, S. J.; Pintauro, P. N. Properties and Fuel Cell Performance of a Nanofiber Composite Membrane with 660 Equivalent Weight Perfluorosulfonic Acid. *J. Electrochem. Soc.* **2013**, *160*, F429. DOI: 10.1149/2.088304jes
7. Breitwieser, M.; Klose, C.; Klingele, M.; Hartmann, A.; Erben, J.; Cho H.; Kerres J.; Zengerle, R.; Thiele, S. Simple fabrication of 12  $\mu\text{m}$  thin nanocomposite fuel cell membranes by direct

- electrospinning and printing. *J. Power Sources* **2017**, *337*, 137–144. DOI: 10.1016/j.jpowsour.2016.10.094
8. Lee, C.; Na, H.; Jeon, Y.; Hwang, H. J.; Kim, H.-J.; Isao Mochida, I.; Yoon, S.-H.; Park, J.-I.; Shul, Y.-G. Poly(ether imide) Nanofibrous Web Composite Membrane with SiO<sub>2</sub>/Heteropolyacid Ionomer for Durable and High-Temperature Polymer Electrolyte Membrane (PEM) Fuel Cells. *J. Ind. Eng. Chem.* **2019**, *74*, 7–13. DOI: 10.1016/j.jiec.2019.01.034
9. Aricò, A. S.; Di Blasi, A.; Brunaccini, G.; Sergi, F.; Dispenza, G.; Andaloro, L.; Ferraro, M.; Antonucci, V.; Asher, P.; Buche, S.; Fongalland, D.; Hards, G. A.; Sharman, J. D. B.; Bayer, A.; Heinz, G.; Zandonà, N.; Zuber, R.; Gebert, M.; Corasaniti, M.; Ghielmi, A.; Jones, D. J. High Temperature Operation of a Solid Polymer Electrolyte Fuel Cell Stack Based on a New Ionomer Membrane. *Fuel Cells* **2010**, *10*, 1013–1023. DOI: 10.1002/fuce.201000031
